# Supplementary material
Source: publisher figshare collection journal article supplement (https://acs.figshare.com/ndownloader/files/4591066)
Supplement: Supplementary file 1 [file 4591066]

## Supporting Information

For

### **H<sub>2</sub>O<sub>2</sub>-Reactivity of Copper(II) Complexes Supported by TPA Ligands with 6-Phenyl Substituents.**

**Atsushi Kunishita,<sup>‡</sup> Minoru Kubo,<sup>§</sup> Hirohito Ishimaru,<sup>§</sup> Takashi Ogura,<sup>§</sup>  
Hideki Sugimoto,<sup>‡</sup> and Shinobu Itoh<sup>\*,†,‡,§</sup>**

<sup>†</sup>*Department of Material and Life Science, Division of Advanced Science and Biotechnology,  
Graduate School of Engineering, Osaka University, 2-1 Yamadaoka, Suita, Osaka 565-0871,  
Japan*

<sup>‡</sup>*Department of Chemistry, Graduate School of Science, Osaka City University, 3-3-138  
Sugimoto, Sumiyoshi-ku, Osaka 558-8585, Japan*

<sup>§</sup>*Institute for Molecular Science, National Institutes of Natural Sciences,  
38 Nishigo-Naka, Myodaiji, Okazaki 444-8585, Japan*

<sup>§</sup>*Research Institute of Picobiology, Graduate School of Life Science, University of Hyogo,  
3-2-1 Kouto, Kamigori-cho, Ako-gun, Hyogo 678-1297, Japan*

<sup>\*</sup>Corresponding Author: shinobu@mls.eng.osaka-u.ac.jp

## Contents

**Figure S1.** ESR spectrum of **TPACu** and its computer simulation spectrum.

**Figure S2.** ESR spectrum of **1** and its computer simulation spectrum.

**Figure S3.** ESR spectrum of **2** and its computer simulation spectrum.

**Figure S4.** ESR spectrum of **3** and its computer simulation spectrum.

**Figure S5.** Cyclic voltammogram of **TPACu**.

**Figure S6.** Cyclic voltammogram of **1**.

**Figure S7.** Cyclic voltammogram of **2**.

**Figure S8.** Cyclic voltammogram of **3**.

**Figure S9.** ESR spectrum of **1-OOH** and its computer simulation spectrum.

**Figure S10.** UV-vis of **2-oxo**.

**Figure S11.** ESI-MS and elemental analysis data of **3<sup>red</sup>**.

**Figure S1**

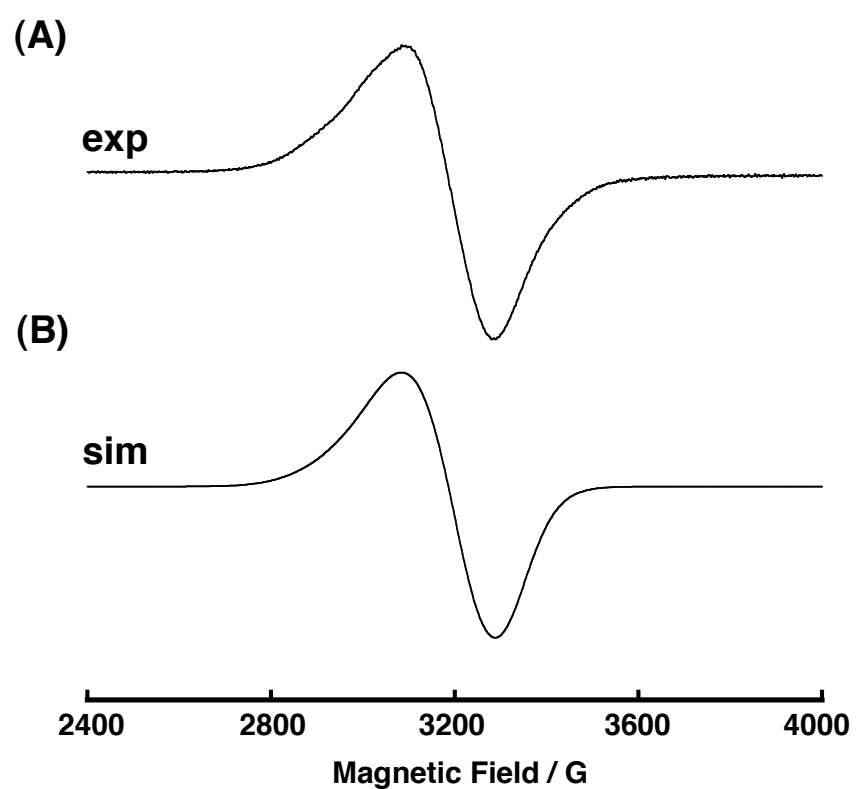

**Figure S1.** (A) ESR spectrum of **CuTPA** in  $\text{CH}_3\text{CN}$  at  $-145\text{ }^\circ\text{C}$  and (B) a computer simulation spectrum with ESR parameters,  $g_1 = 2.170$ ,  $g_2 = 2.068$ ,  $g_3 = 2.145$ ,  $A_1 = 100\text{ G}$ ,  $A_2 = 30\text{ G}$ ,  $A_3 = 30\text{ G}$ ,  $W_1 = 200\text{ G}$ ,  $W_2 = 100\text{ G}$ ,  $W_3 = 130\text{ G}$ .

**Figure S2**

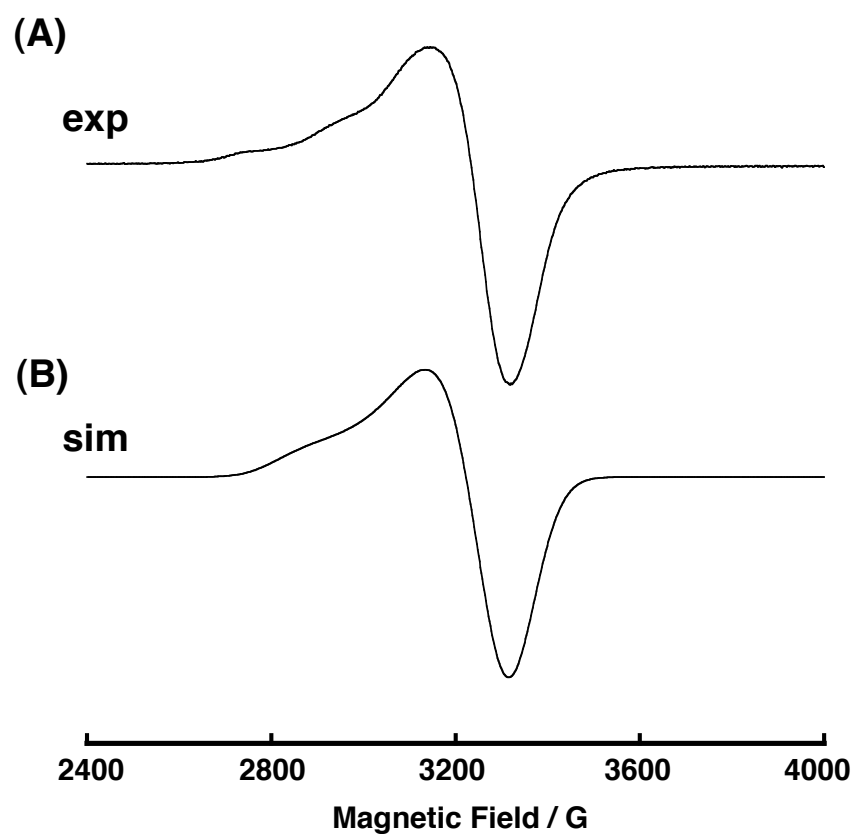

**Figure S2.** (A) ESR spectrum of **1** in CH<sub>3</sub>CN at -145 °C and (B) a computer simulation spectrum with ESR parameters,  $g_1 = 2.235$ ,  $g_2 = 2.043$ ,  $g_3 = 2.090$ ,  $A_1 = 100$  G,  $A_2 = 5$  G,  $A_3 = 30$  G,  $W_1 = 130$  G,  $W_2 = 110$  G,  $W_3 = 150$  G.

**Figure S3**

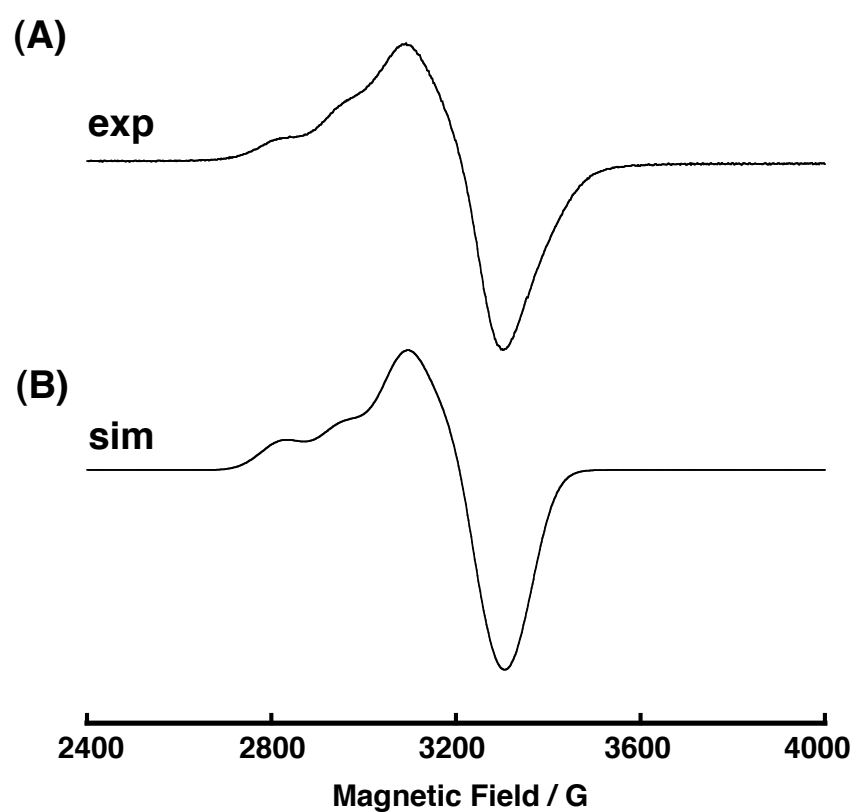

**Figure S3.** (A) ESR spectrum of **2** in CH<sub>3</sub>CN at -145 °C and (B) a computer simulation spectrum with ESR parameters,  $g_1 = 2.230$ ,  $g_2 = 2.040$ ,  $g_3 = 2.140$ ,  $A_1 = 130$  G,  $A_2 = 18$  G,  $A_3 = 18$  G,  $W_1 = 96$  G,  $W_2 = 90$  G,  $W_3 = 100$  G

**Figure S4**

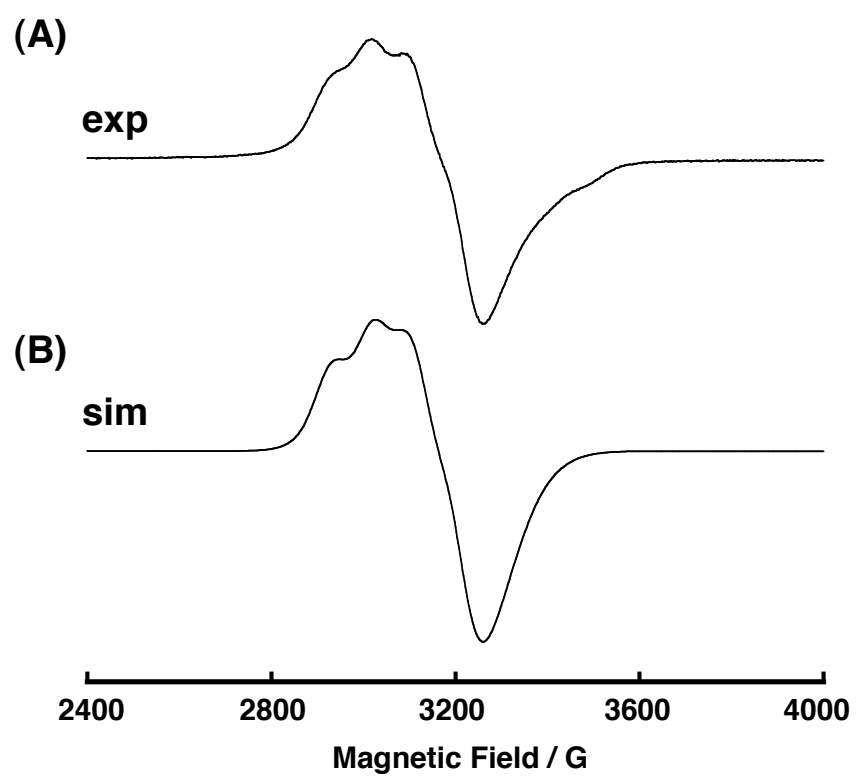

**Figure S4.** (A) ESR spectrum of **3** in CH<sub>3</sub>CN at -144 °C and (B) a computer simulation spectrum with ESR parameters,  $g_1 = 2.185$ ,  $g_2 = 2.110$ ,  $g_3 = 2.120$ ,  $A_1 = 90$  G,  $A_2 = 2$  G,  $A_3 = 22$  G,  $W_1 = 58$  G,  $W_2 = 160$  G,  $W_3 = 230$  G

**Figure S5**

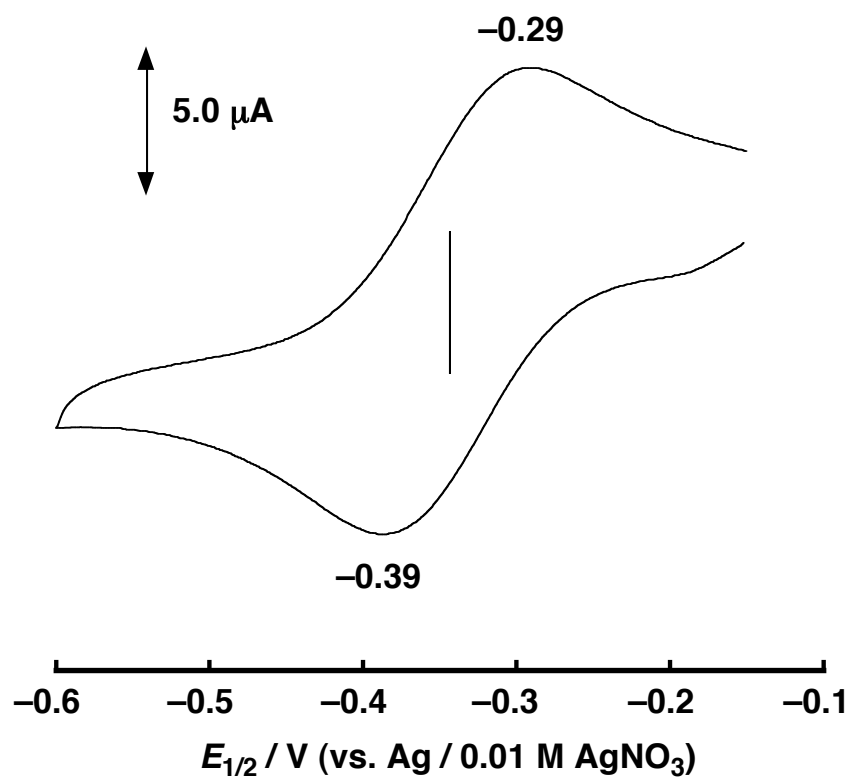

**Figure S5.** Cyclic voltammogram of **CuTPA** ( $2.0 \times 10^{-3}$  M) in  $\text{CH}_3\text{CN}$  containing 0.1 M TBAP; working electrode Pt, counter electrode Pt, pseudo-reference electrode Ag / 0.01 M  $\text{AgNO}_3$ , scan rate 50 mV/s.

**Figure S6**

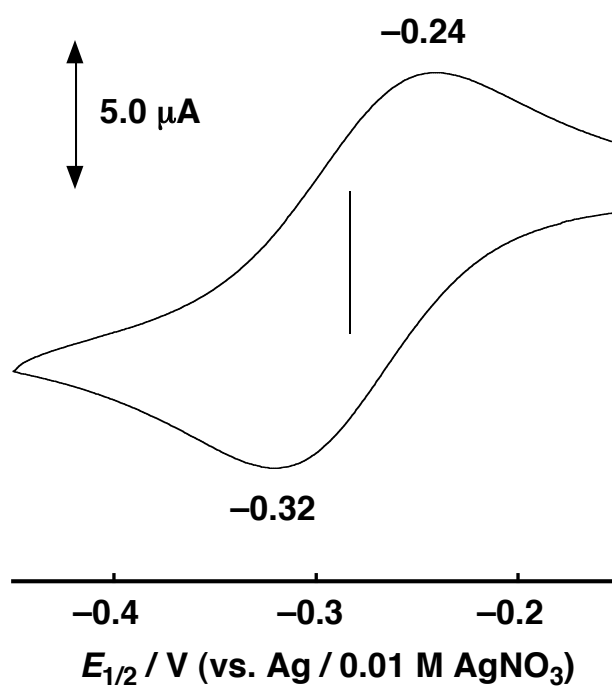

**Figure S6.** Cyclic voltammogram of **1** ( $2.0 \times 10^{-3}$  M) in CH<sub>3</sub>CN containing 0.1 M TBAP; working electrode Pt, counter electrode Pt, pseudo-reference electrode Ag / 0.01 M AgNO<sub>3</sub>, scan rate 50 mV/s.



**Figure S7**

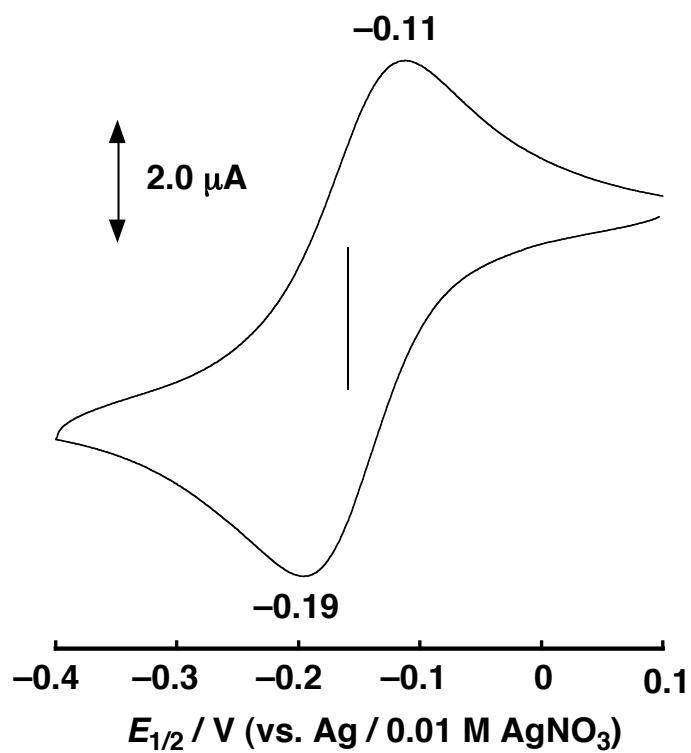

**Figure S7.** Cyclic voltammogram of **2** ( $2.0 \times 10^{-3} \text{ M}$ ) in  $\text{CH}_3\text{CN}$  containing  $0.1 \text{ M}$  TBAP; working electrode Pt, counter electrode Pt, pseudo-reference electrode Ag /  $0.01 \text{ M AgNO}_3$ , scan rate  $50 \text{ mV/s}$ .

**Figure S8**

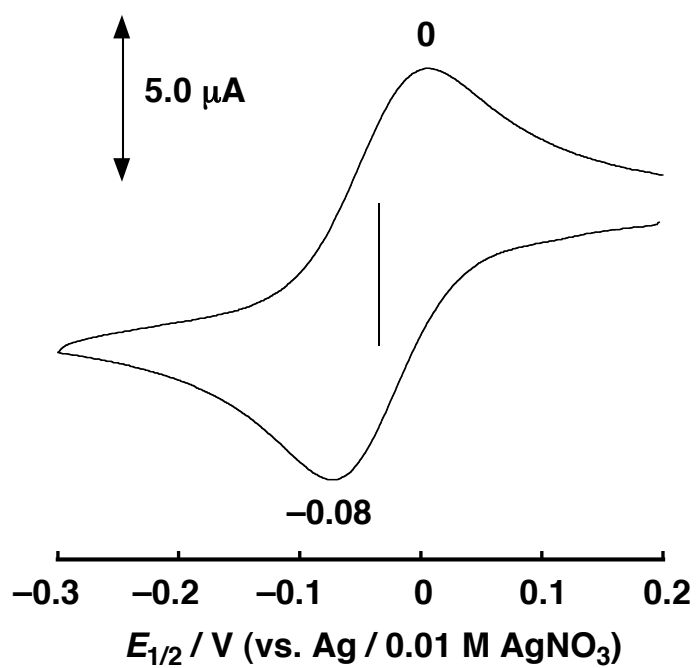

**Figure S8.** Cyclic voltammogram of **3** ( $2.0 \times 10^{-3}$  M) in  $\text{CH}_3\text{CN}$  containing 0.1 M TBAP; working electrode Pt, counter electrode Pt, pseudo-reference electrode Ag / 0.01 M  $\text{AgNO}_3$ , scan rate 50 mV/s.

**Figure S9**

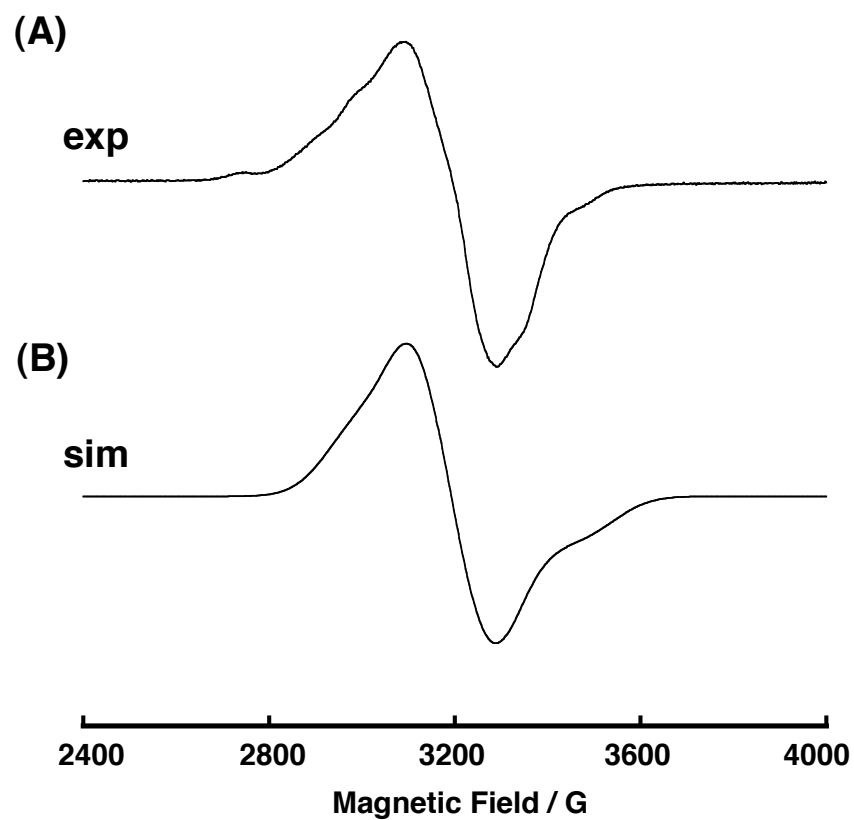

**Figure S9.** ESR spectrum (A) **1-OOH** in CH<sub>3</sub>CN at -144 °C and (B) the computer simulation spectrum with the parameter  $g_1 = 2.075$ ,  $g_2 = 2.145$ ,  $g_3 = 2.065$ ,  $A_1 = 166$  G,  $A_2 = 20$  G, and  $A_3 = 15$  G  $W_1 = 150$  G,  $W_2 = 100$  G,  $W_3 = 95$  G

**Figure S10**

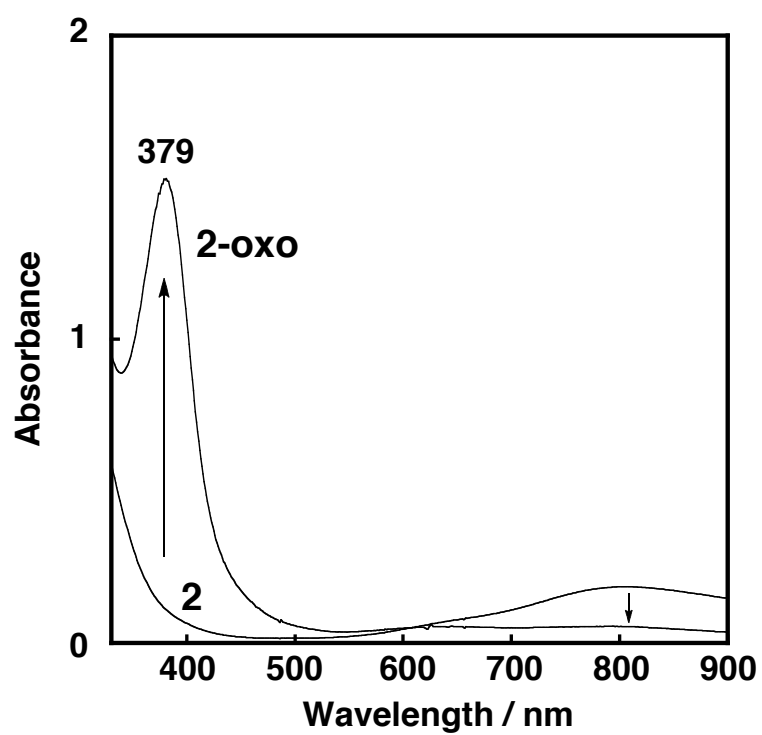

**Figure S10.** Spectral change for the reaction of **2** (0.6 mM) with H<sub>2</sub>O<sub>2</sub> (6.0 mM) in the presence of NEt<sub>3</sub> (1.2 mM) in CH<sub>3</sub>CN at -40°C.

**Figure S11**

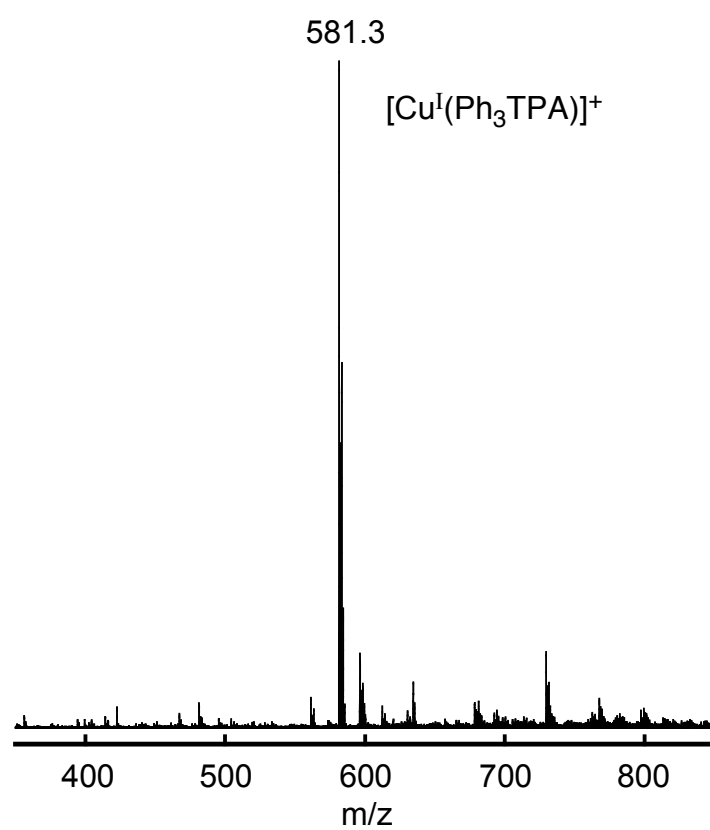

Anal. Calcd for  $\mathbf{3}^{\text{red}} \cdot 0.5 \text{H}_2\text{O}$  ( $\text{C}_{36}\text{H}_{31}\text{Cu}_1\text{Cl}_1\text{N}_4\text{O}_{4.5}$ ): C, 62.61; H, 4.52; N, 8.11

Found: C, 62.64; H, 4.36; N, 8.09

**Figure S11.** ESI-MS of  $\mathbf{3}^{\text{red}}$  generated by the reaction of **3** and  $\text{H}_2\text{O}_2$  in  $\text{CH}_3\text{CN}$  and elemental analysis data of  $\mathbf{3}^{\text{red}}$ .
